# Supplementary material for: High-efficiency visible-light photocatalytic H2O2 production using CdSe-based core/shell quantum dots
Source: Royal Society of Chemistry journal article supplement (doi:10.1039/d2cy00269h), 2022-01-01
Supplement: d2cy00269h1.pdf [file d2cy00269h1.pdf]

Electronic Supplementary Material (ESI) for Catalysis Science & Technology.  
This journal is © The Royal Society of Chemistry 2022

## Supporting Information

### High-Efficiency Visible-light Photocatalytic H<sub>2</sub>O<sub>2</sub> Production

#### Using CdSe-based Core/shell Quantum Dots†

Wenkai Ji,<sup>‡a</sup> Zaixiang Xu,<sup>‡a</sup> Shijie Zhang,<sup>‡a</sup> Yang Li,<sup>\*abc</sup> Zhikang Bao,<sup>a</sup> Zijiang Zhao,<sup>a</sup> Liang Xie,<sup>a</sup> Xing Zhong,<sup>a</sup> Zhongzhe Wei,<sup>a</sup> and Jianguo Wang <sup>\*a</sup>

a. Institute of Industrial Catalysis, College of Chemical Engineering, State Key Laboratory Breeding Base of Green-Chemical Synthesis Technology, Zhejiang University of Technology, Hangzhou 310032, Zhejiang, China.

b. School of Physics and Optoelectronic Engineering, Hangzhou Institute for Advanced Study, University of Chinese Academy of Sciences, Hangzhou 310024, China.

c. Research Institute of Intelligent Sensing, Zhejiang Lab, Hangzhou, 311100, China.

† These authors contributed equally to this work.

#### Corresponding Author

[ly@ucas.ac.cn](mailto:ly@ucas.ac.cn) (Yang Li), [jgw@zjut.edu.cn](mailto:jgw@zjut.edu.cn) (Jianguo Wang).

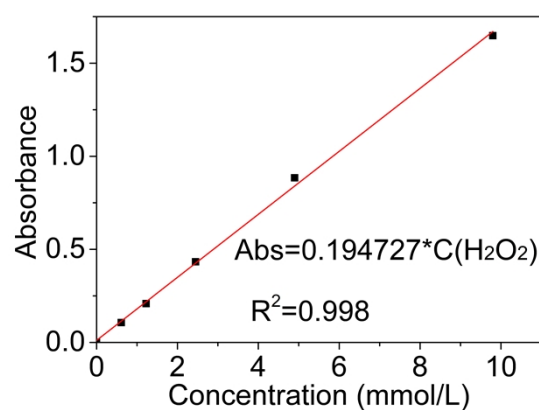

**Fig S1.** The work curve for determination of  $H_2O_2$  concentration. The calibration curve was prepared by 1 mL of the  $H_2O_2$  solution with quantified concentration and add with 2.0 mL of deionized water and 2.0 mL of titanium potassium oxalate solution (0.05 mol/L). The absorbance of  $H_2O_2$  chromogenic solution was monitored by measuring the absorbance at 400 nm.

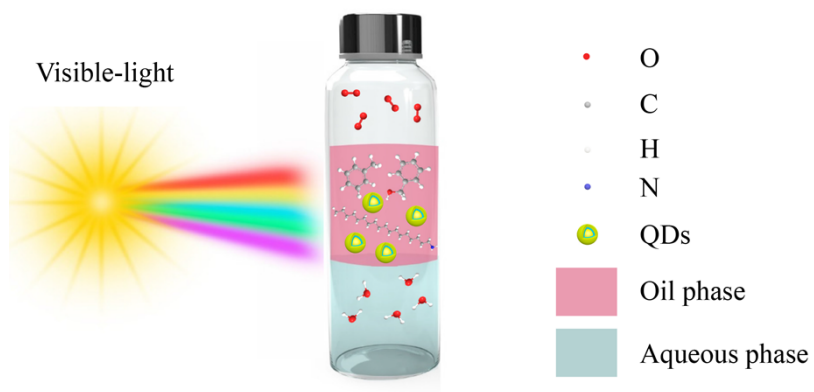

**Fig S2.** Photocatalytic  $\text{H}_2\text{O}_2$  production utilizing the two-phase system.

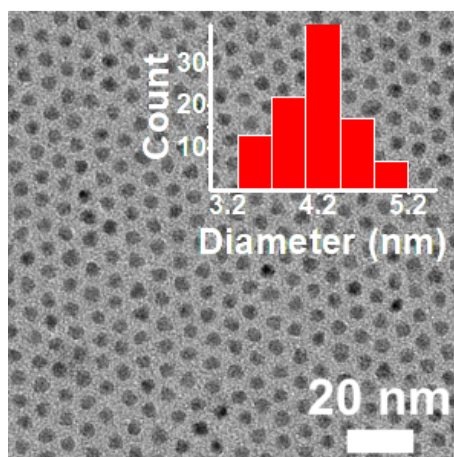

**Fig S3.** TEM images of CdSe<sub>590</sub> plain core QDs. Inset: the size distribution histograms of CdSe<sub>590</sub> plain core QDs.

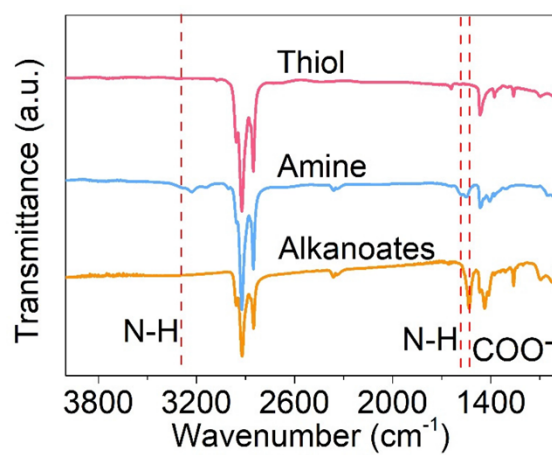

**Fig S4.** FT-IR spectra of thiol-, amine-, alkanates-coated CdSe<sub>550</sub> QDs.

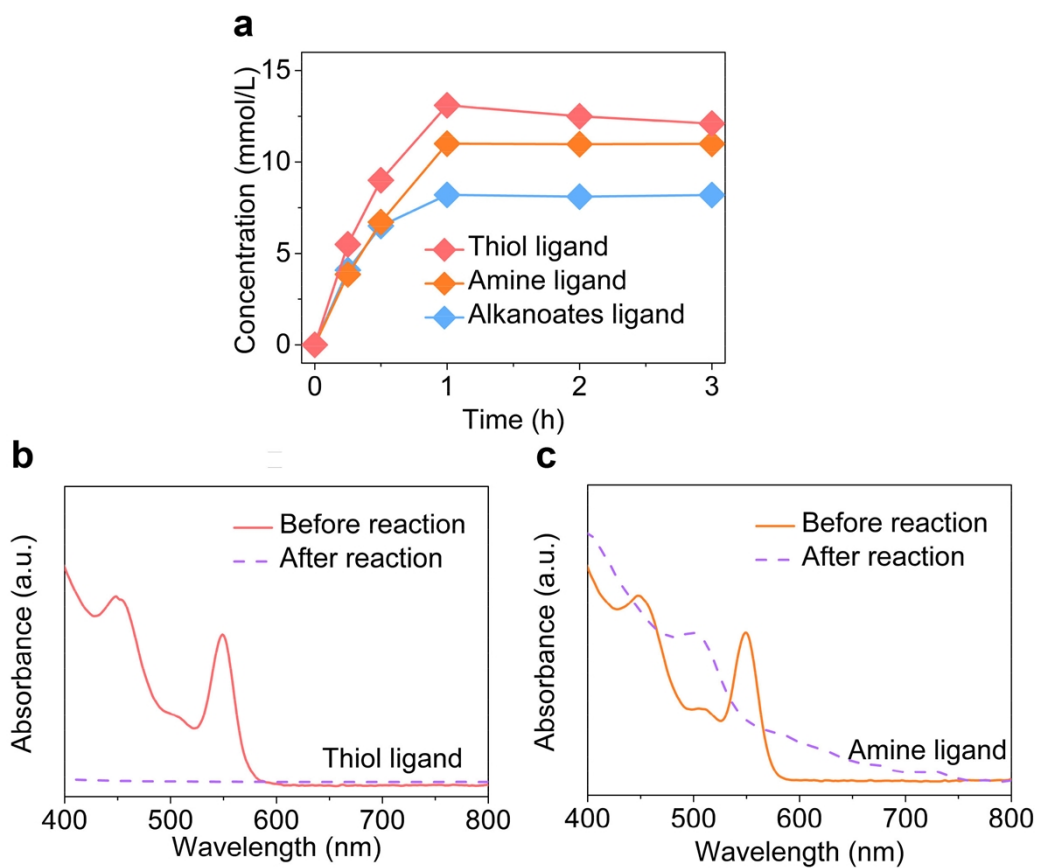

**Fig S5.** (a) Time courses of H<sub>2</sub>O<sub>2</sub> production catalyzed by thiol-coated CdSe<sub>550</sub> QDs (pink), amine-coated CdSe<sub>550</sub> QDs (orange) and alkanates-coated CdSe<sub>550</sub> QDs (blue). (b) the UV-vis absorption spectra of the thiol-coated CdSe<sub>550</sub> QDs before reaction (solid line) and after reaction (dash line) (c) the UV-vis absorption spectra of the amine-coated CdSe<sub>550</sub> QDs before reaction (solid line) and after reaction (dash line).

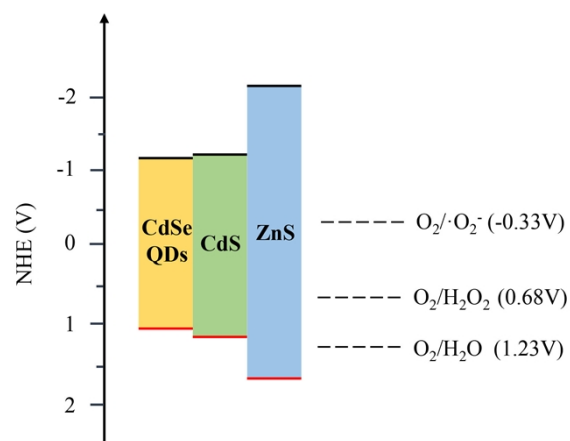

**Fig S6.** Energy levels of CdSe-based QDs and standard redox potential (*Versus* NHE) of oxygen reduction.

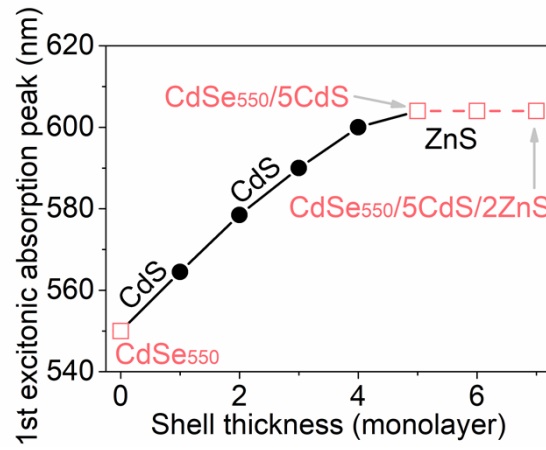

**Fig. S7.** Evolution of the 1<sup>st</sup> absorption peak of QDs with the shell thickness.



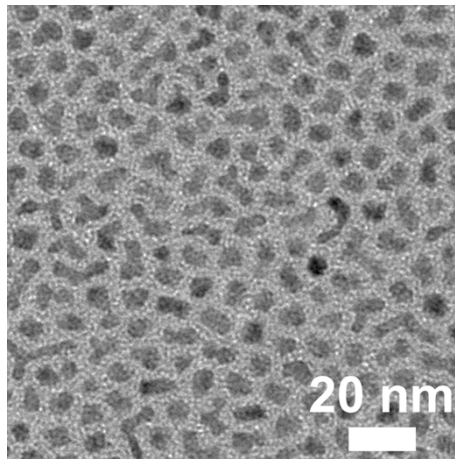

**Fig S8.** TEM images of CdSe<sub>550</sub>/5CdS/3ZnS QDs.

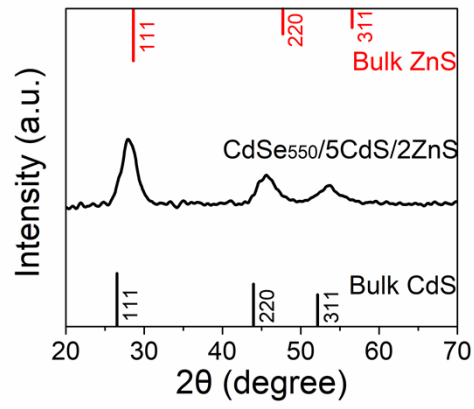

**Fig S9.** XRD pattern of CdSe<sub>550</sub>/5CdS/2ZnS after reaction.

Before Reaction

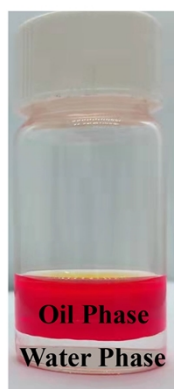

After Reaction

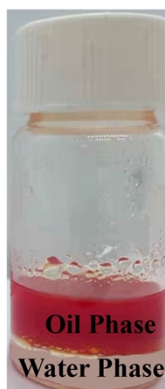

**Fig S10.** The digital photographs of two-phase systems composed of an aqueous phase and an oil phase containing CdSe<sub>550</sub>/5CdS/2ZnS before reaction (left) and after reaction (right).

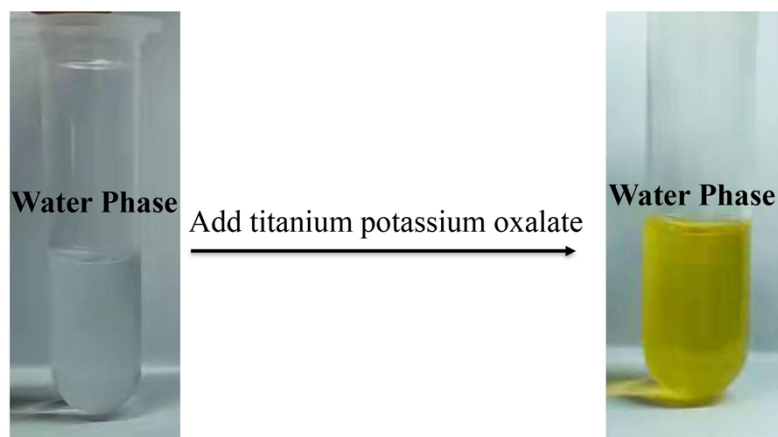

**Fig S11.** The digital photographs of the water phase in the two-phase system solution after photocatalytic reaction before (left) and after (right) adding titanium potassium oxalate.

**Table S1.** Summary of the photocatalytic H<sub>2</sub>O<sub>2</sub> production with various photocatalysts.

| Catalyst                                          | Solvent                  | Concentration of photocatalyst /mg mL <sup>-1</sup> | Time/h   | H <sub>2</sub> O <sub>2</sub> yields /mmol L <sup>-1</sup> | References                                     |
|---------------------------------------------------|--------------------------|-----------------------------------------------------|----------|------------------------------------------------------------|------------------------------------------------|
| <b>CdSe/5CdS/2ZnS</b>                             | <b>Oil/Water</b>         | <b>~3.2</b>                                         | <b>2</b> | <b>126</b>                                                 | <b>This work</b>                               |
| a-C <sub>3</sub> N <sub>4</sub>                   | Ethanol/water            | 1                                                   | 4        | ~30                                                        | <i>J. Energy Chem. 2022</i> <sup>1</sup>       |
| CdSe/KPN-HCP                                      | Water                    | 1                                                   | 1        | 0.9                                                        | <i>Chem. Eng. J.2021</i> <sup>2</sup>          |
| Pd-BiVO <sub>4</sub>                              | CH <sub>3</sub> OH/water | 9.9                                                 | 2        | 0.6                                                        | <i>Appl. Catal.2020</i> <sup>3</sup>           |
| MIL-125-NH <sub>2</sub>                           | benzyl alcohol /water    | ~0.7                                                | 3        | ~2.4                                                       | <i>Angew. Chem. Int. Ed. 2019</i> <sup>4</sup> |
| SN-GQD/TiO <sub>2</sub>                           | 2-propanol/water         | 0.5                                                 | 1        | 0.45                                                       | <i>Appl. Catal.2018</i> <sup>5</sup>           |
| CdS-graphene                                      | Water                    | 1                                                   | 12       | ~0.16                                                      | <i>J. Catal.2016</i> <sup>6</sup>              |
| g-C <sub>3</sub> N <sub>4</sub> /PDI <sub>x</sub> | Water                    | 1.7                                                 | 48       | 1.7                                                        | <i>Angew. Chem. Int. Ed. 2014</i> <sup>7</sup> |
| TiO <sub>2</sub>                                  | benzyl alcohol /water    | 10                                                  | 10       | 40                                                         | <i>ACS Catal. 2013</i> <sup>8</sup>            |

**Table S2.** Simulation parameters used for ESR measurement (DMPO radical trapping agent).

| Radicals        | Simulation Parameters |         |                    |
|-----------------|-----------------------|---------|--------------------|
|                 | $A_N/G$               | $A_H/G$ | Additional $A_H/G$ |
| $\cdot O_2^-$   | 13.3                  | 8.5     | 14.2               |
| Ph $\cdot$ CHOH | 14.2                  | 21.5    | /                  |

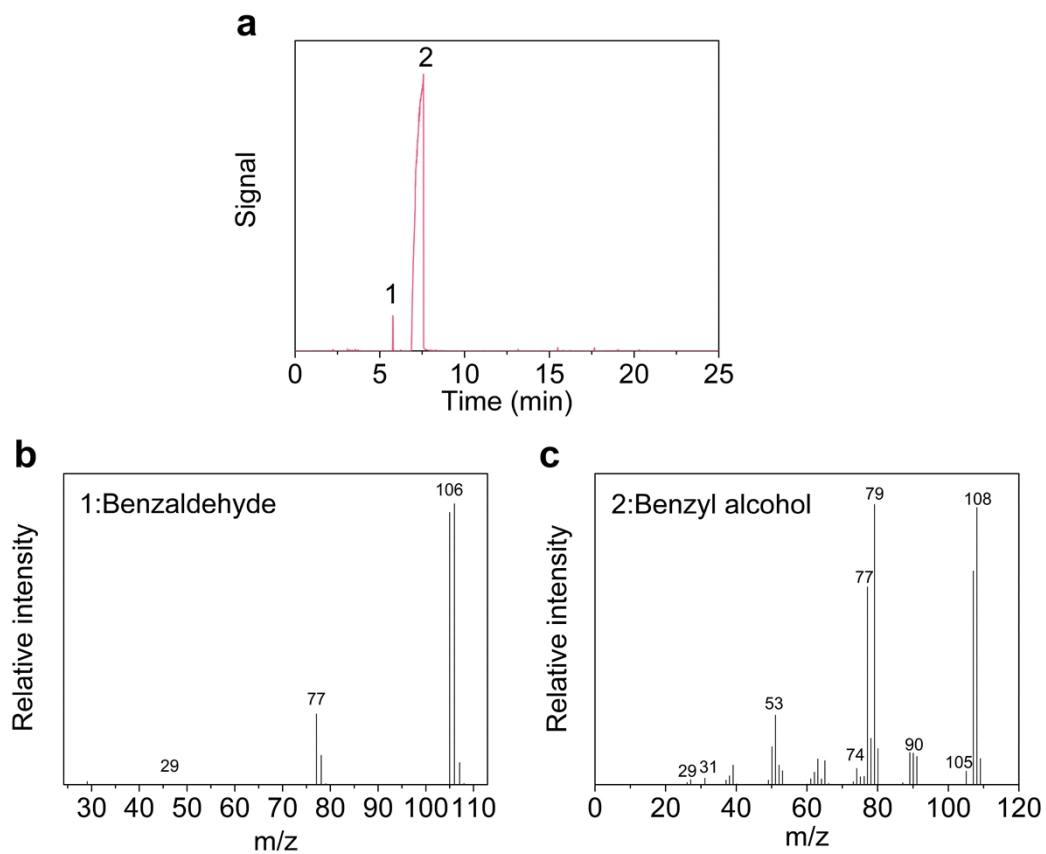

**Fig S12.** The oil phase product of the two-phase system catalyzed by CdSe<sub>550</sub>/5CdS/2ZnS QDs. (a) GC spectral. (b)-(c) The MS spectral of the two peaks marked with 1, 2 in a. Benzyl alcohol was oxidized to benzaldehyde as product.

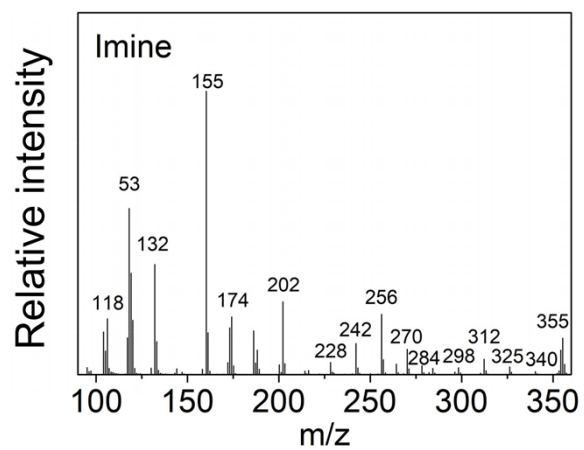

**Fig S13.** The MS spectral of the imine produced by the experiment.



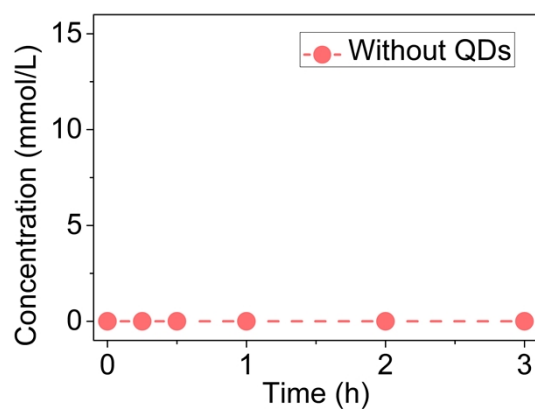

**Fig S14.** Time courses of  $\text{H}_2\text{O}_2$  production of two-phase system without adding QDs.

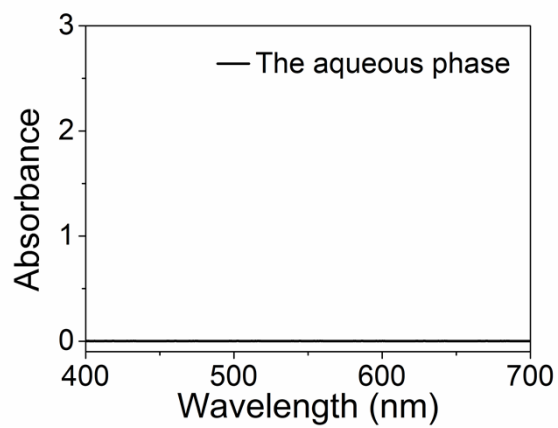

**Fig S15.** The UV-vis absorption spectra of the aqueous phase after reaction.

## References

- 1 Z. Xu, Y. Li, Y. Cao, R. Du, Z. Bao, S. Zhang, F. Shao, W. Ji, J. Yang, G. Zhuang, S. Deng, Z. Wei, Z. Yao, X. Zhong and J. Wang, *J. Energy Chem.*, 2022, **64**, 47-54.
- 2 J. Xu, Q. Ji, Y. Wang, C. Wang and L. Wang, *Chem. Eng. J.*, 2021, **426**, 130808.
- 3 K. Fuku, R. Takioka, K. Iwamura, M. Todoroki, K. Sayama and N. Ikenaga, *Appl. Catal.*, 2020, **272**, 119003.
- 4 Y. Isaka, Y. Kawase, Y. Kuwahara, K. Mori and H. Yamashita, *Angew.Chem., Int. Ed.*, 2019, **58**, 5402-5406.
- 5 L. Zheng, H. Su, J. Zhang, L. S. Walekar, H. Vafaei Molamahmood, B. Zhou, M. Long and Y. H. Hu, *Appl. Catal.*, 2018, **239**, 475-484.
- 6 S. Thakur, T. Kshetri, N. H. Kim and J. H. Lee, *J. Catal.*, 2017, **345**, 78-86.
- 7 Y. Shiraishi, S. Kanazawa, Y. Kofuji, H. Sakamoto, S. Ichikawa, S. Tanaka and T. Hirai, *Angew.Chem., Int. Ed.*, 2014, **53**, 13454-13459.
- 8 Y. Shiraishi, S. Kanazawa, D. Tsukamoto, A. Shiro, Y. Sugano and T. Hirai, *ACS Catal.*, 2013, **3**, 2222-2227.
